# Supplementary material
Source: publisher figshare collection journal article supplement (https://karger.figshare.com/ndownloader/files/26010827)
Supplement: Supplementary file 1 [file 26010827]

**Figure S1.** Matrix scatter plots showing correlations between oral health with prospective memory and other background

cognitive assessments for Study 1


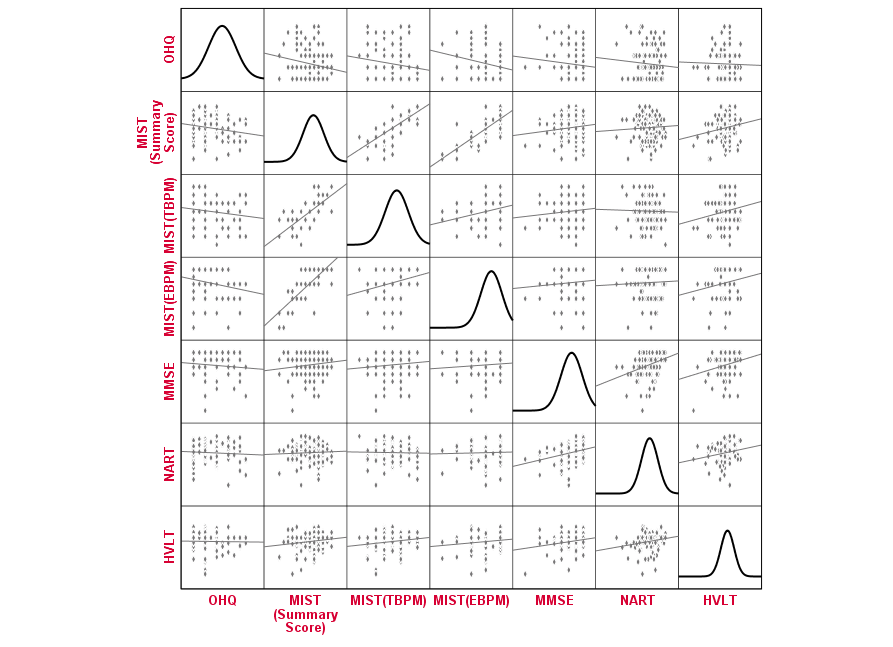


Abbreviations: OHQ, Oral Health Questionnaire; MIST, Memory for Intentions Screening Test; TBPM, time-based prospective memory; EBPM, event-based prospective memory; MMSE, Mini Mental State Examination; NART, National Adult Reading Test; HVLT, Hopkins Verbal Learning Test

**Figure S2:** Matrix scatter plots showing correlations between oral health and oral care capacity with prospective memory and other background cognitive assessments for Study 2


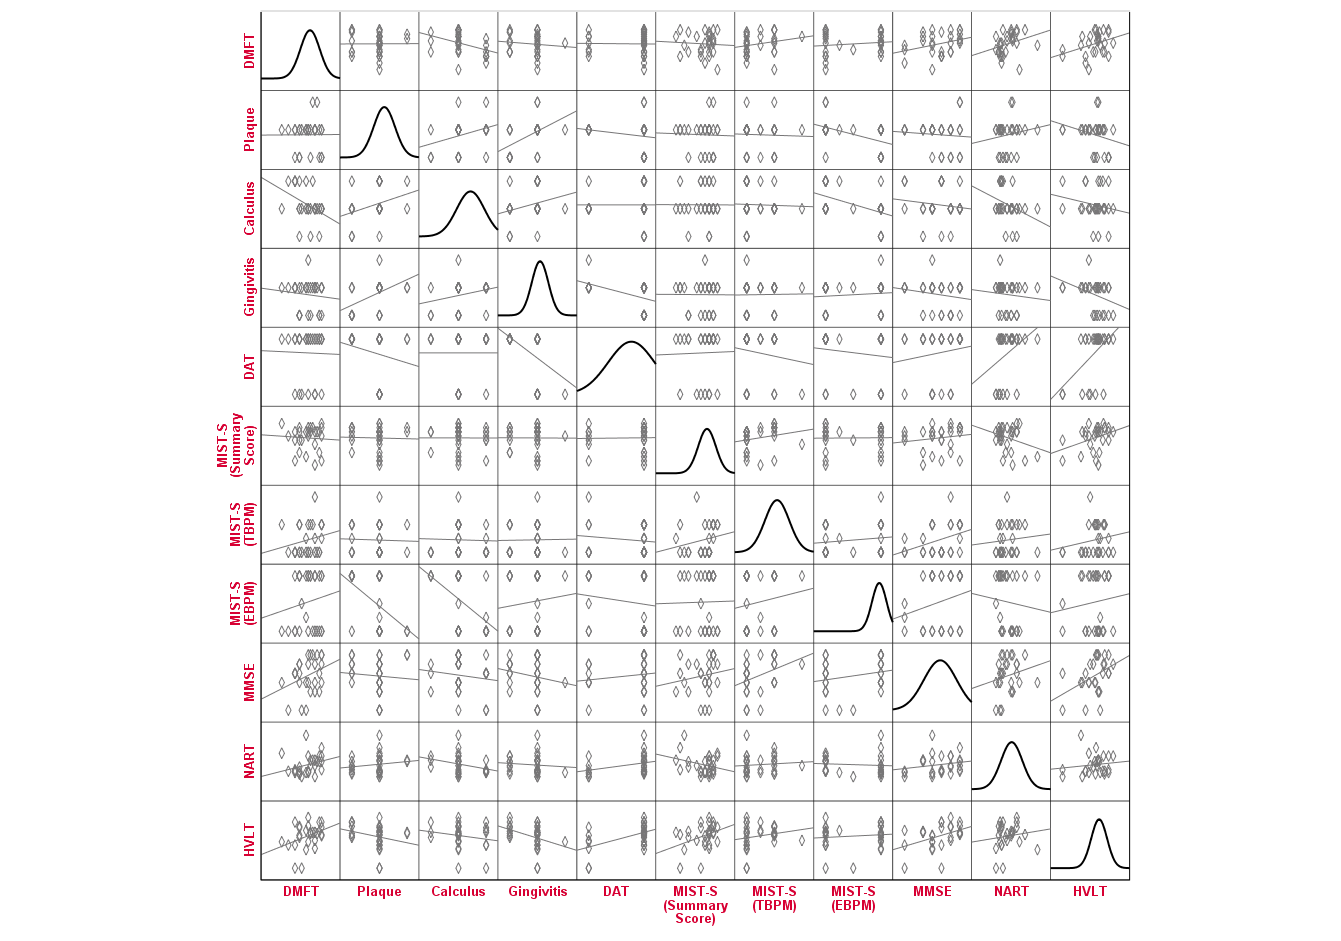


Abbreviations: MIST-S, Memory for Intentions Screening Test (Short Version); TBPM, time-based prospective memory; EBPM, event-based prospective memory; MMSE, Mini Mental State Examination; NART, National Adult Reading Test; HVLT, Hopkins Verbal Learning Test; DMFT, Decayed Missing and Filled Teeth Index; DAT, Dental Activities Test.
